# Supplementary material for: Formation of the syn isomer of [FeIV(Oanti)(TMC)(NCMe)]2+ in the reaction of Lewis acids with the side-on bound peroxo ligand in [FeIII(η2-O2)(TMC)]+
Source: Royal Society of Chemistry journal article supplement (doi:10.1039/c6cc01660j), 2016-01-01
Supplement: c6cc01660j1.pdf [file c6cc01660j1.pdf]

# Supporting Information

For

## **Formation of the *syn* Isomer of $[\text{Fe}^{\text{IV}}(\text{O}_{\text{anti}})(\text{TMC})(\text{NCMe})]^{2+}$ in the Reaction of Lewis Acids with the Side-on Bound Peroxo Ligand in $[\text{Fe}^{\text{III}}(\eta^2\text{-O}_2)(\text{TMC})]^+$**

Jai Prakash<sup>†</sup> and Lawrence Que Jr.<sup>†</sup>

<sup>†</sup>Department of Chemistry and Center for Metals in Biocatalysis, University of Minnesota, Minneapolis, Minnesota 55455, United States

Contents:

Page

|           |                                                                                                                |    |
|-----------|----------------------------------------------------------------------------------------------------------------|----|
|           | General considerations and physical methods                                                                    | S2 |
| Figure S1 | <sup>1</sup> H-NMR spectra of species <b>2</b> obtained in CD <sub>3</sub> CN at -10 °C over the period of 1 h | S3 |
| Figure S2 | UV-vis spectrum of the reaction of <b>2</b> with 1 equiv. of NOSbF <sub>6</sub>                                | S3 |
| Figure S3 | <sup>1</sup> H-NMR spectra of the reaction of <b>2</b> with 1 equiv. of NOSbF <sub>6</sub>                     | S4 |

## Experimental Section:

### General Considerations

All reagents were purchased from commercial sources and used as received, unless otherwise noted. The complex,  $\text{Fe}^{\text{II}}(\text{TMC})(\text{OTf})_2$ ,<sup>1</sup> and iodosylbenzene ( $\text{C}_6\text{H}_5\text{IO}$ )<sup>2</sup> were synthesized according to previously published procedures. The complex  $[\text{Fe}^{\text{III}}(\eta^2\text{-O}_2)(\text{TMC})](\text{ClO}_4)$  was synthesized following an earlier reported procedure with a minor variation.<sup>3</sup> All moisture and oxygen sensitive compounds were prepared using standard Schlenk-line techniques, and a nitrogen-filled glove box was used for any subsequent manipulation and storage of these compounds.

### Physical Methods

NMR spectra were recorded in deuterated solvents using either Varian Inova/Bruker 400 or 300 MHz spectrometers, and chemical shifts (ppm) were referenced to residual protic solvent peaks. UV-vis spectroscopic measurements were performed using a HP8453A diode array spectrometer equipped with a cryostat from Unisoku Scientific Instruments (Osaka, Japan). Electrospray-ionization mass spectrometry (ESI-MS) experiments were carried out on a Bruker BioTOF II mass spectrometer using a spray chamber voltage of 4000 V and a carrier gas temperature of 25 °C.

**Synthesis of  $[\text{Fe}^{\text{III}}(\eta^2\text{-O}_2)(\text{TMC})](\text{ClO}_4)$  (2):** To the methanolic solution of  $\text{Fe}^{\text{II}}(\text{TMC})(\text{OTf})_2$  (20 mg in 2 mL) at -40 °C was added 10 equiv. of  $\text{H}_2\text{O}_2$  and 20 equiv. of  $\text{Et}_3\text{N}$ , and the solution was stirred for 30 min to give greenish-blue solution. To this solution was added 10 equiv. of the solid  $\text{NaClO}_4$  followed by cold diethyl ether (10 mL, kept at -40 °C) to precipitate out **2** as purple solid. The solvents were carefully decanted and the solid was dried under vacuum at -10 °C. The dried solid was further washed several times with cold diethyl ether to remove any unreacted  $\text{Et}_3\text{N}$  and  $\text{H}_2\text{O}_2$ .

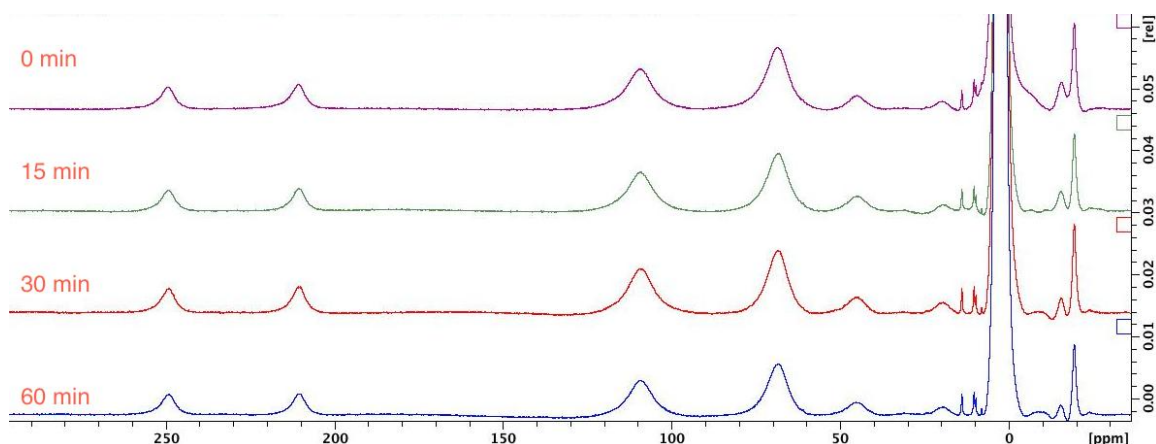

**Figure S1.**  $^1\text{H}$ -NMR spectra of species **2**, recorded in  $\text{CD}_3\text{CN}$  at  $-10\text{ }^\circ\text{C}$  over a period of one hour. The resonances at 68 and 109 ppm correspond to the N-Me protons with line widths (full width at half maximum, FWHM) of 3000 and 3200 Hz respectively. There was no evident change observed in the spectra during this period.

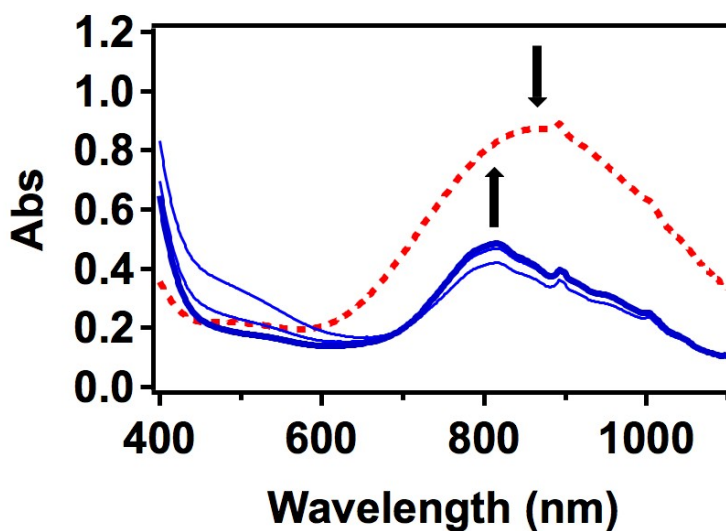

**Figure S2.** UV-vis spectral change upon addition of 1 equiv. of  $[\text{NO}][\text{SbF}_6]$  to an acetonitrile solution of **2** (1.5 mM, red dotted line) at  $-10\text{ }^\circ\text{C}$  to give **1S**.

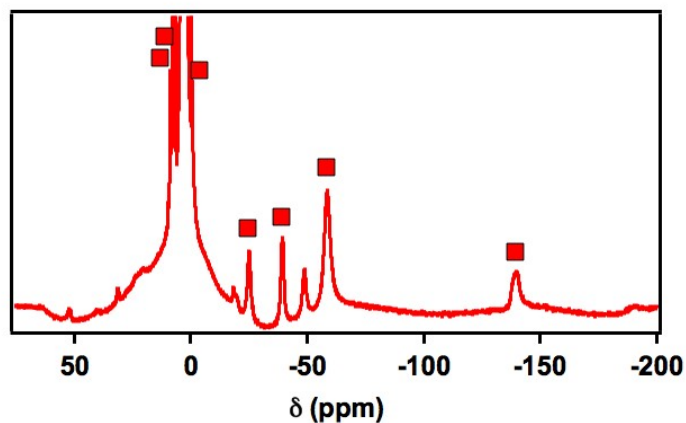

**Figure S3.**  $^1\text{H}$ -NMR spectra of **1S** (marked with “■”) from the reaction of **2** (10 mM) with 1 equiv. of  $[\text{NO}][\text{SbF}_6]$  at  $-10\text{ }^\circ\text{C}$  in  $\text{CD}_3\text{CN}$ . Integration of the N-Me resonances ( $-48$  for **1A** and  $-55$  ppm for **1S**) gives a ratio of  $\sim 5:1$  for **1S/1A**.

#### References:

1. J.-U. Rohde, J.-H. In, M. H. Lim, W. W. Brennessel, M. R. Bukowski, A. Stubna, E. Münck, W. Nam and L. Que, Jr., *Science*, 2003, **299**, 1037-1039.
2. Saltzman, H.; Sharefkin, J. G. *Org. Synth.*, 1963, **43**, 60-61.
3. F. Li, K. M. Van Heuvelen, K. K. Meier, E. Münck and L. Que, Jr., *J. Am. Chem. Soc.*, 2013, **135**, 10198-10201.
